# Supplementary material for: Improving lipid recovery from Scenedesmus wet biomass by surfactant-assisted disruption
Source: Royal Society of Chemistry journal article supplement (doi:10.1039/c5gc02159f), 2015-10-20
Supplement: c5gc02159f1.pdf [file c5gc02159f1.pdf]

**Electronic Supplementary information:**

**Improving lipid recovery from *Scenedesmus* wet biomass by surfactant-assisted disruption**

YenJung Sean Lai<sup>1\*</sup>, Federica De Francesco<sup>2</sup>, Alyssa Aguinaga<sup>1</sup>, Prathap Parameswaran<sup>3\*</sup>, Bruce E Rittmann<sup>1</sup>

<sup>1</sup>Swette Center for Environmental Biotechnology, The Biodesign Institute at Arizona State University, P.O. Box 875701, Tempe, AZ 85287-5701, USA.

<sup>2</sup>Department of Applied Science and Technology, Politecnico di torino, Corso Duca degli Abruzzi, 24 - 10129 Torino, Italy.

<sup>3</sup>Department of Civil Engineering, Kansas State University, 2123 Fiedler Hall, Manhattan, KS 66506, USA

\*Corresponding authors:

YenJung Sean Lai: [ylai30@asu.edu](mailto:ylai30@asu.edu)

Prathap Parameswaran: [prathapp@ksu.edu](mailto:prathapp@ksu.edu)

The supporting information contains 6 pages, including Table S1 for the character of different growth type of biomass, Fig S1 for the quantity of FAME under the two different solvents, Fig S2 FAME profile via Folch and isopropanol extraction under different surfactant treatments, Fig S3 Cell structures of protein-rich *Scenedesmus* biomass under 3\_DAPS, MTMA and SDS treatments, Fig S4 Cell structures of intermediate-lipid *Scenedesmus* biomass under 3\_DAPS, MTMA and SDS treatments, and Fig S5 for the flow cytometer assay with SYTOX green emission.

**Table S1 Summary of characteristic parameters of *Scenedesmus* biomass for the different growth conditions**

| Types                      | TSS   | VSS   | Elemental composition (%) |          |          | Total FAME*          |
|----------------------------|-------|-------|---------------------------|----------|----------|----------------------|
|                            | (g/L) | (g/L) | Carbon                    | Hydrogen | Nitrogen | (% of dried biomass) |
| Protein-rich biomass       | 20    | 20    | 53                        | 9        | 9        | 5 ± 1                |
| Intermediate-lipid biomass | 23    | 23    | 53                        | 9        | 7        | 6 ± 1                |
| High-lipid biomass         | 20    | 20    | 56                        | 10       | 2        | 22 ± 3               |

\*Total FAME obtained via direct transesterification

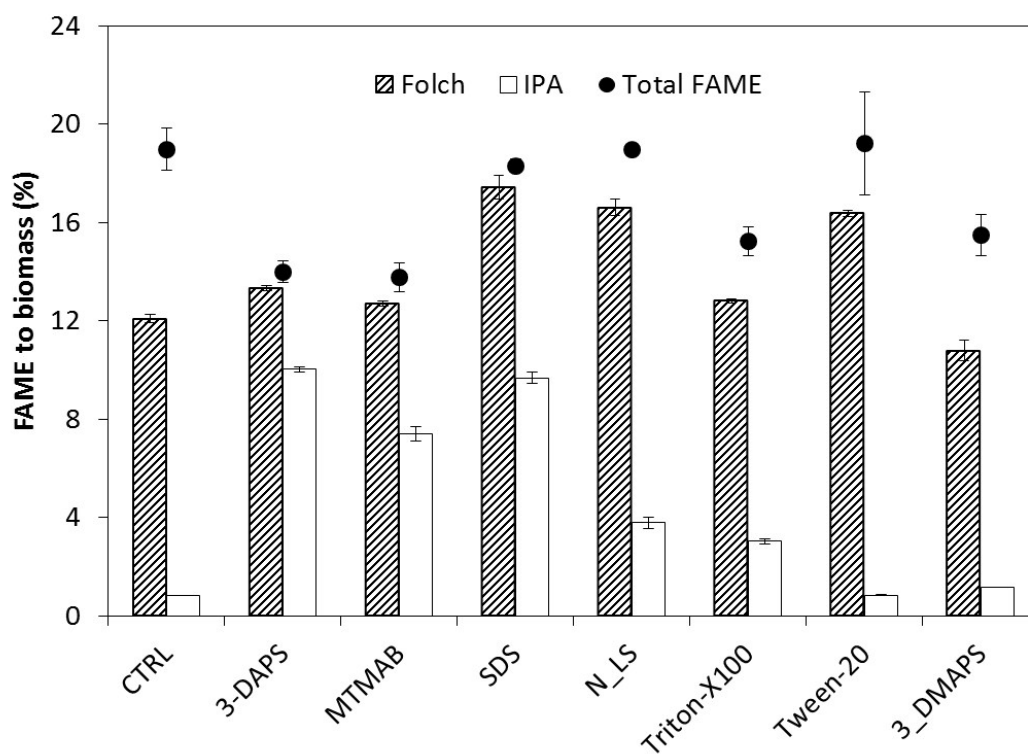

**Figure S1. FAME recovery from dried biomass extraction via Folch and isopropanol for different surfactant treatments and their respective total FAME obtained from direct transesterification.**

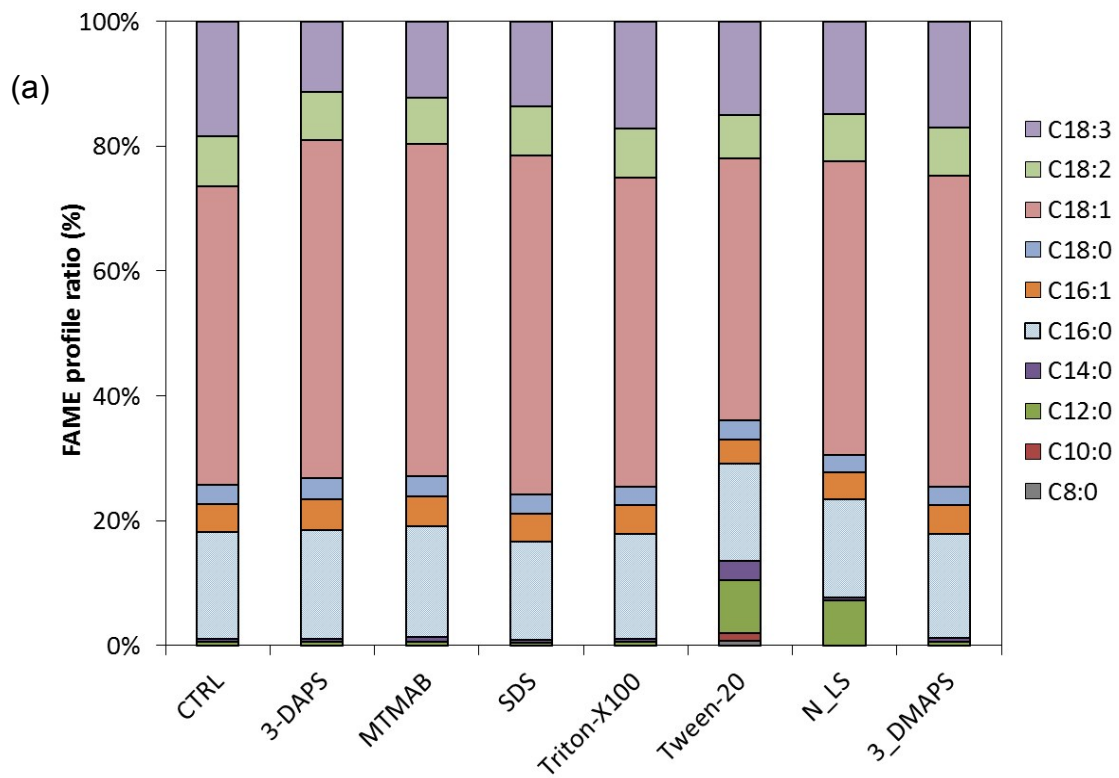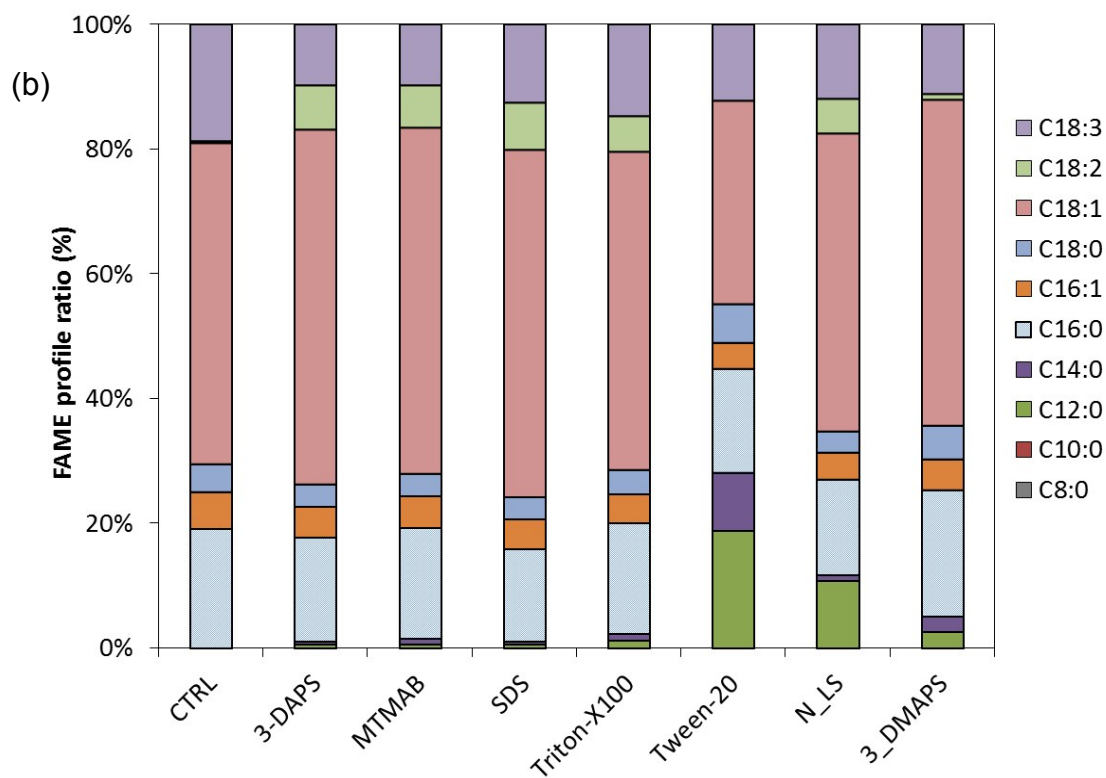

**Figure S2. FAME profiles obtained via (a) Folch solvent (b) isopropanol solvent extraction for the different surfactant treatments.**

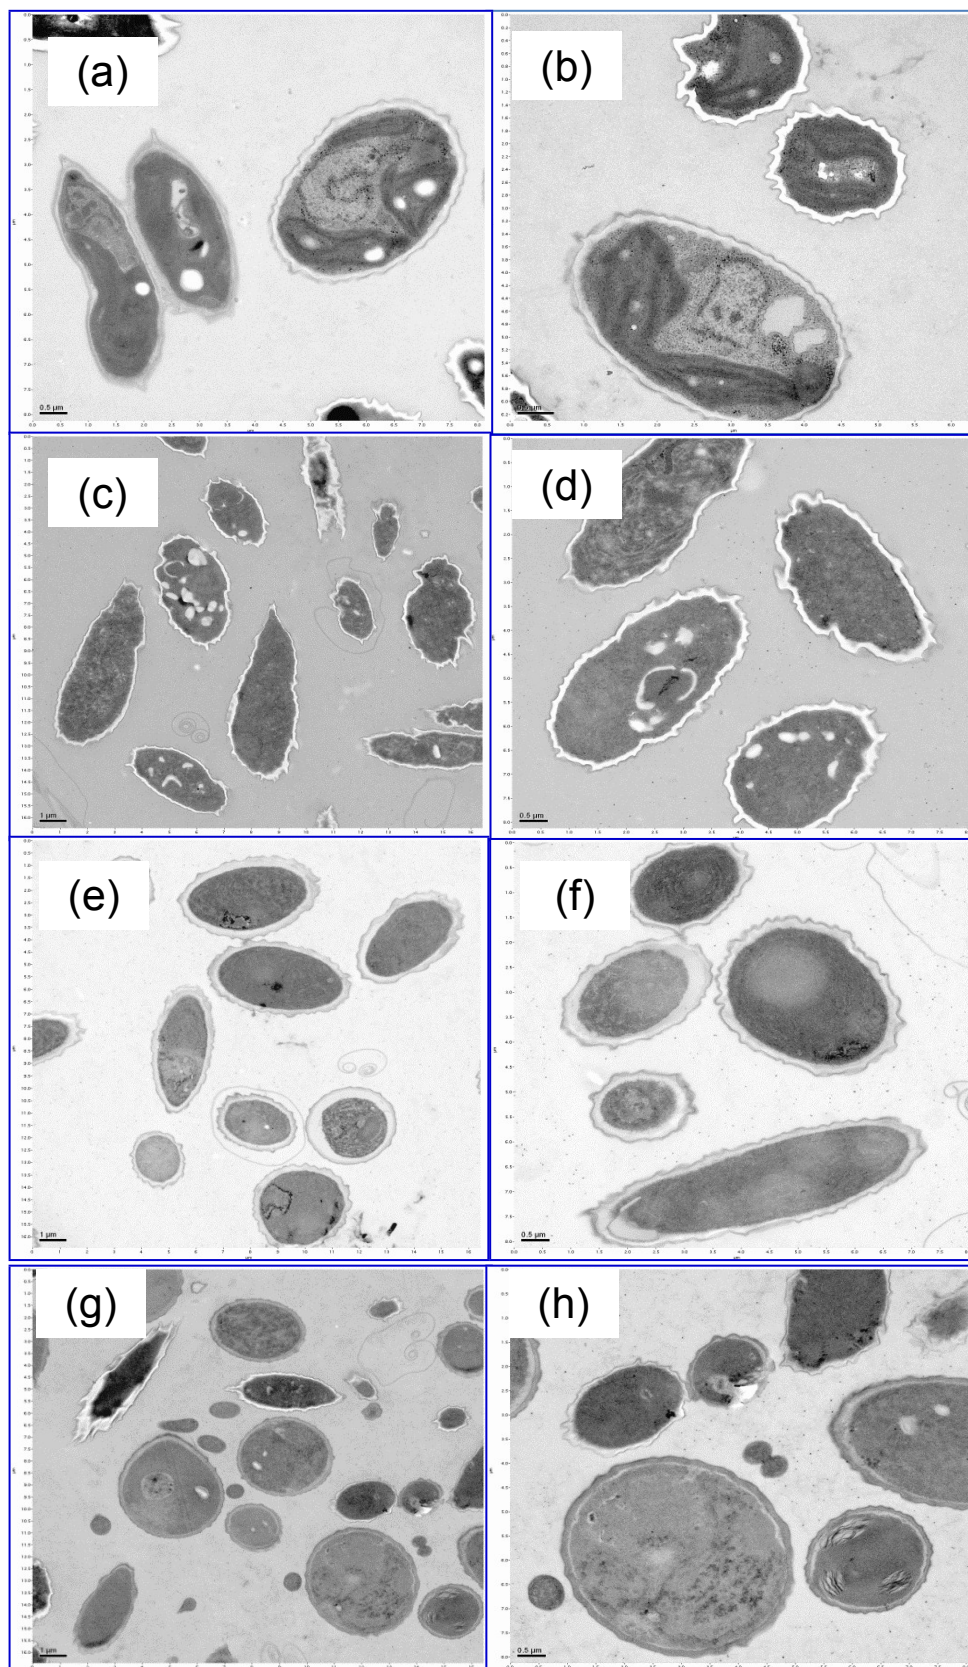

**Figure S3. TEM images of protein-rich *Scenedesmus* biomass for (a, b) control, (c, d) 3\_DAPS-, (e, f) MTAB-, and (g, h) SDS-treated biomass. a, c, e and g belonged to the large-field images and b, d, f and h belonged to local area images.**

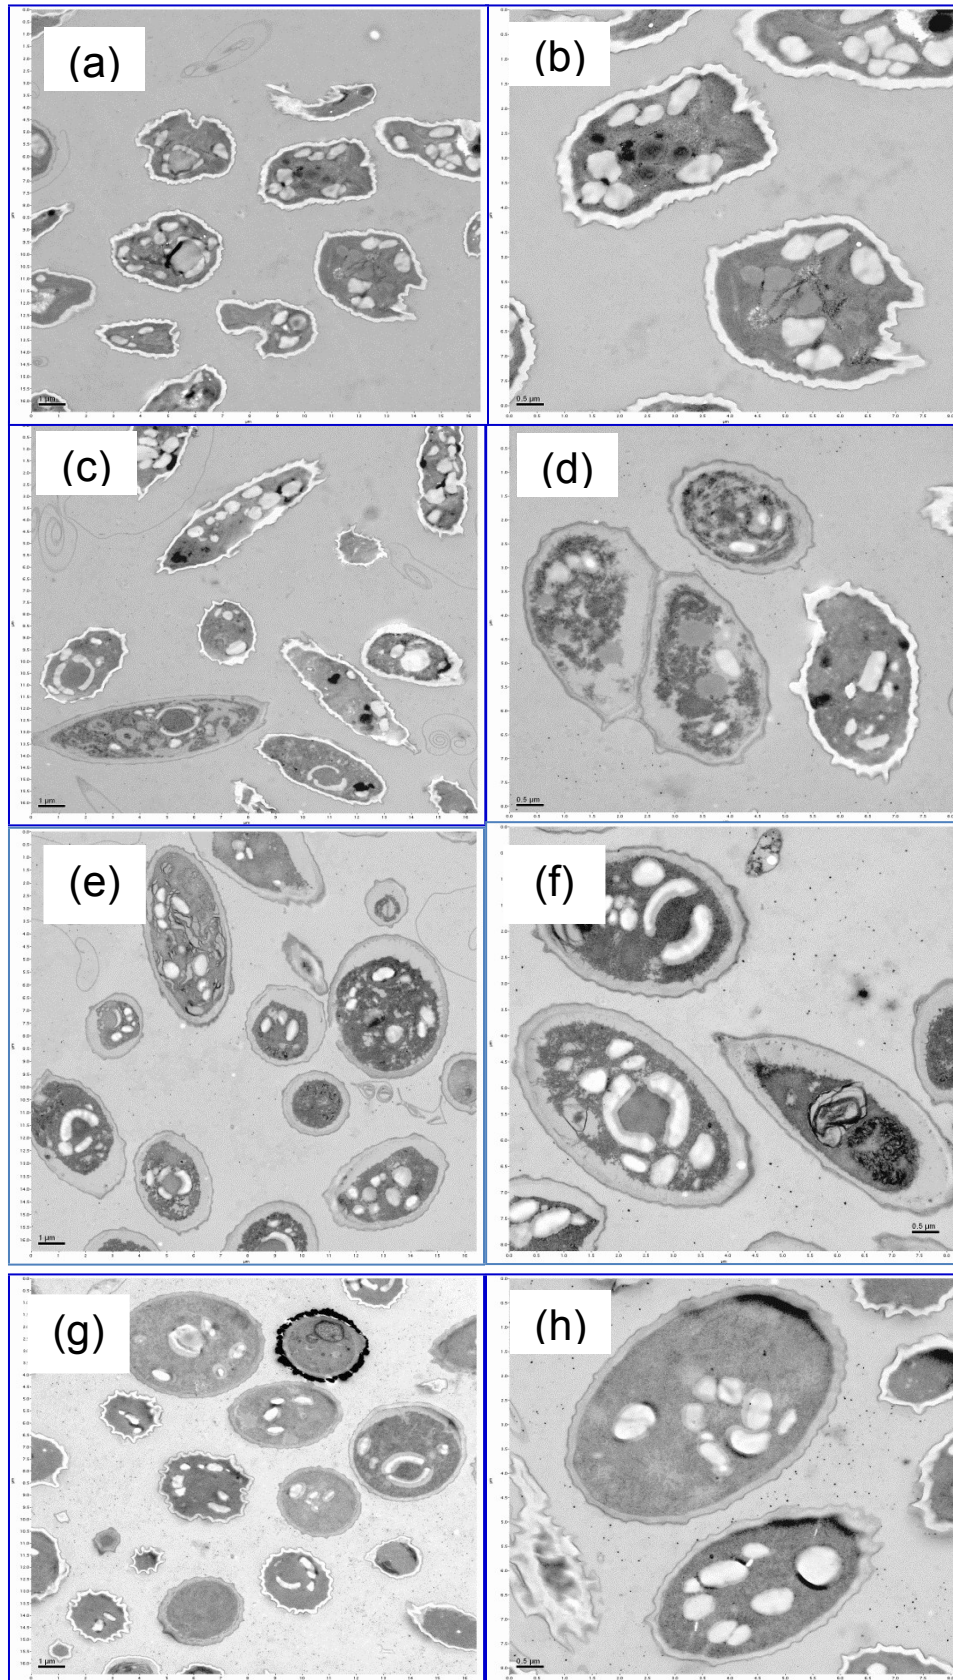

**Figure S4. TEM images of intermediate-lipid *Scenedesmus* biomass for (a, b) control, (c, d) 3\_DAPS-, (e, f) MTAB-, and (g, h) SDS-treated biomass. a, c, e and g belonged to the large-field images and b, d, f and h belonged to local area images.**

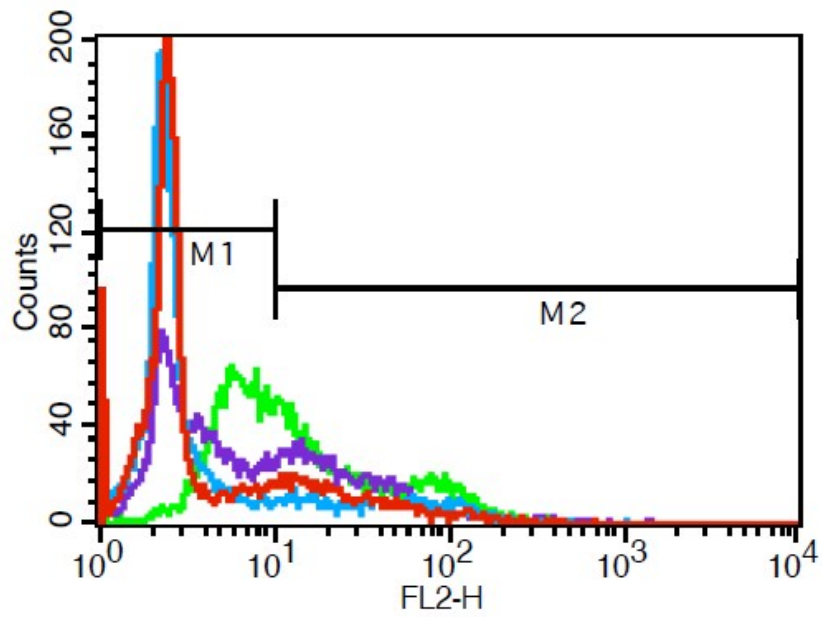

**Figure S5. Efficiency of cell lysis by surfactants as evaluated by flow cytometry for high-lipid *Scenedesmus* biomass amended with SYTOX. Samples are (a) control (red line); (b) 3\_DAPS (green line); (c) MTAB (purple line), and (d) SDS (light blue) surfactant.**
